# Supplementary material
Source: publisher figshare collection journal article supplement (https://gsapubs.figshare.com/articles/dataset/_/21644681)

Margin gap to stop sedimentation: 2 km

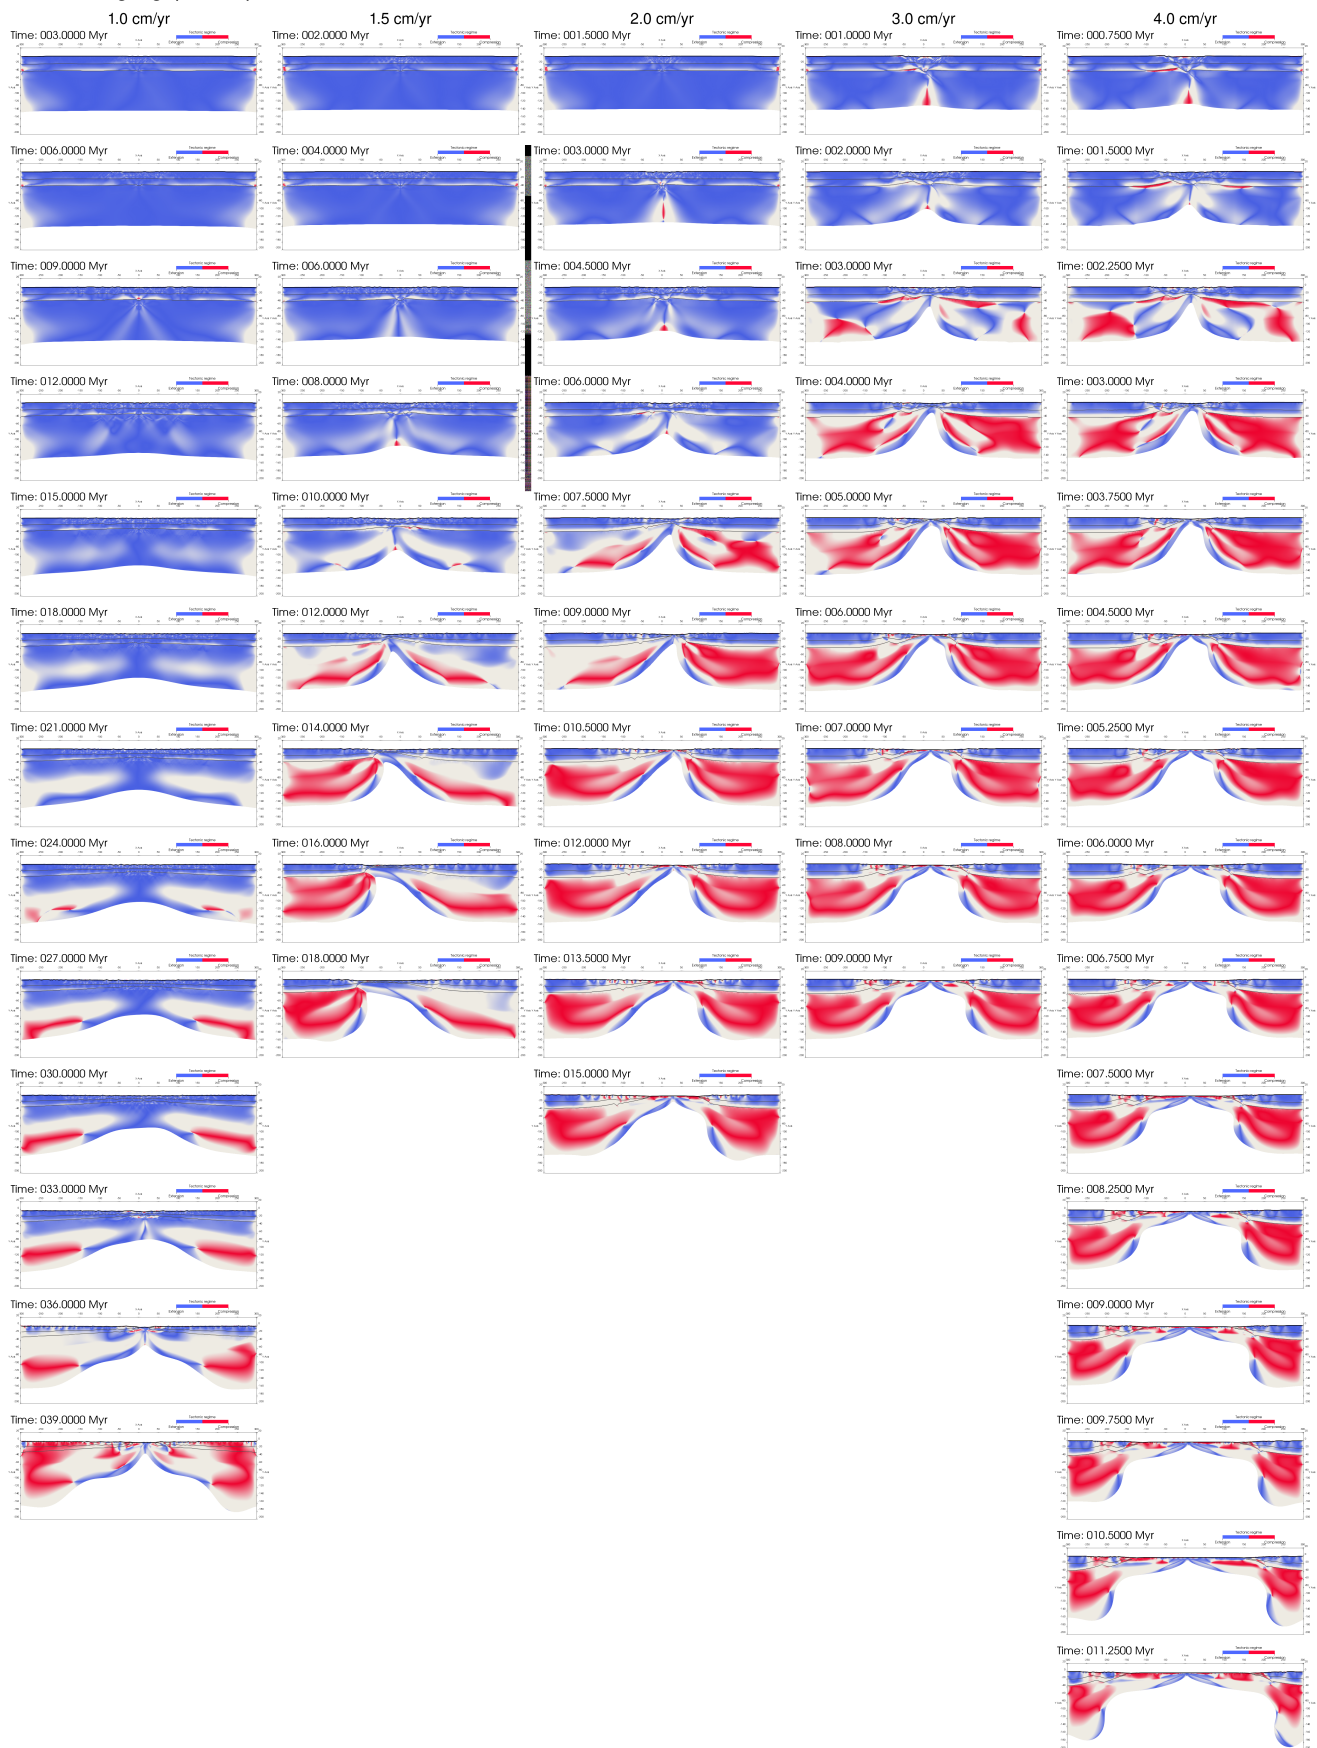

Margin gap to stop sedimentation: 30 km

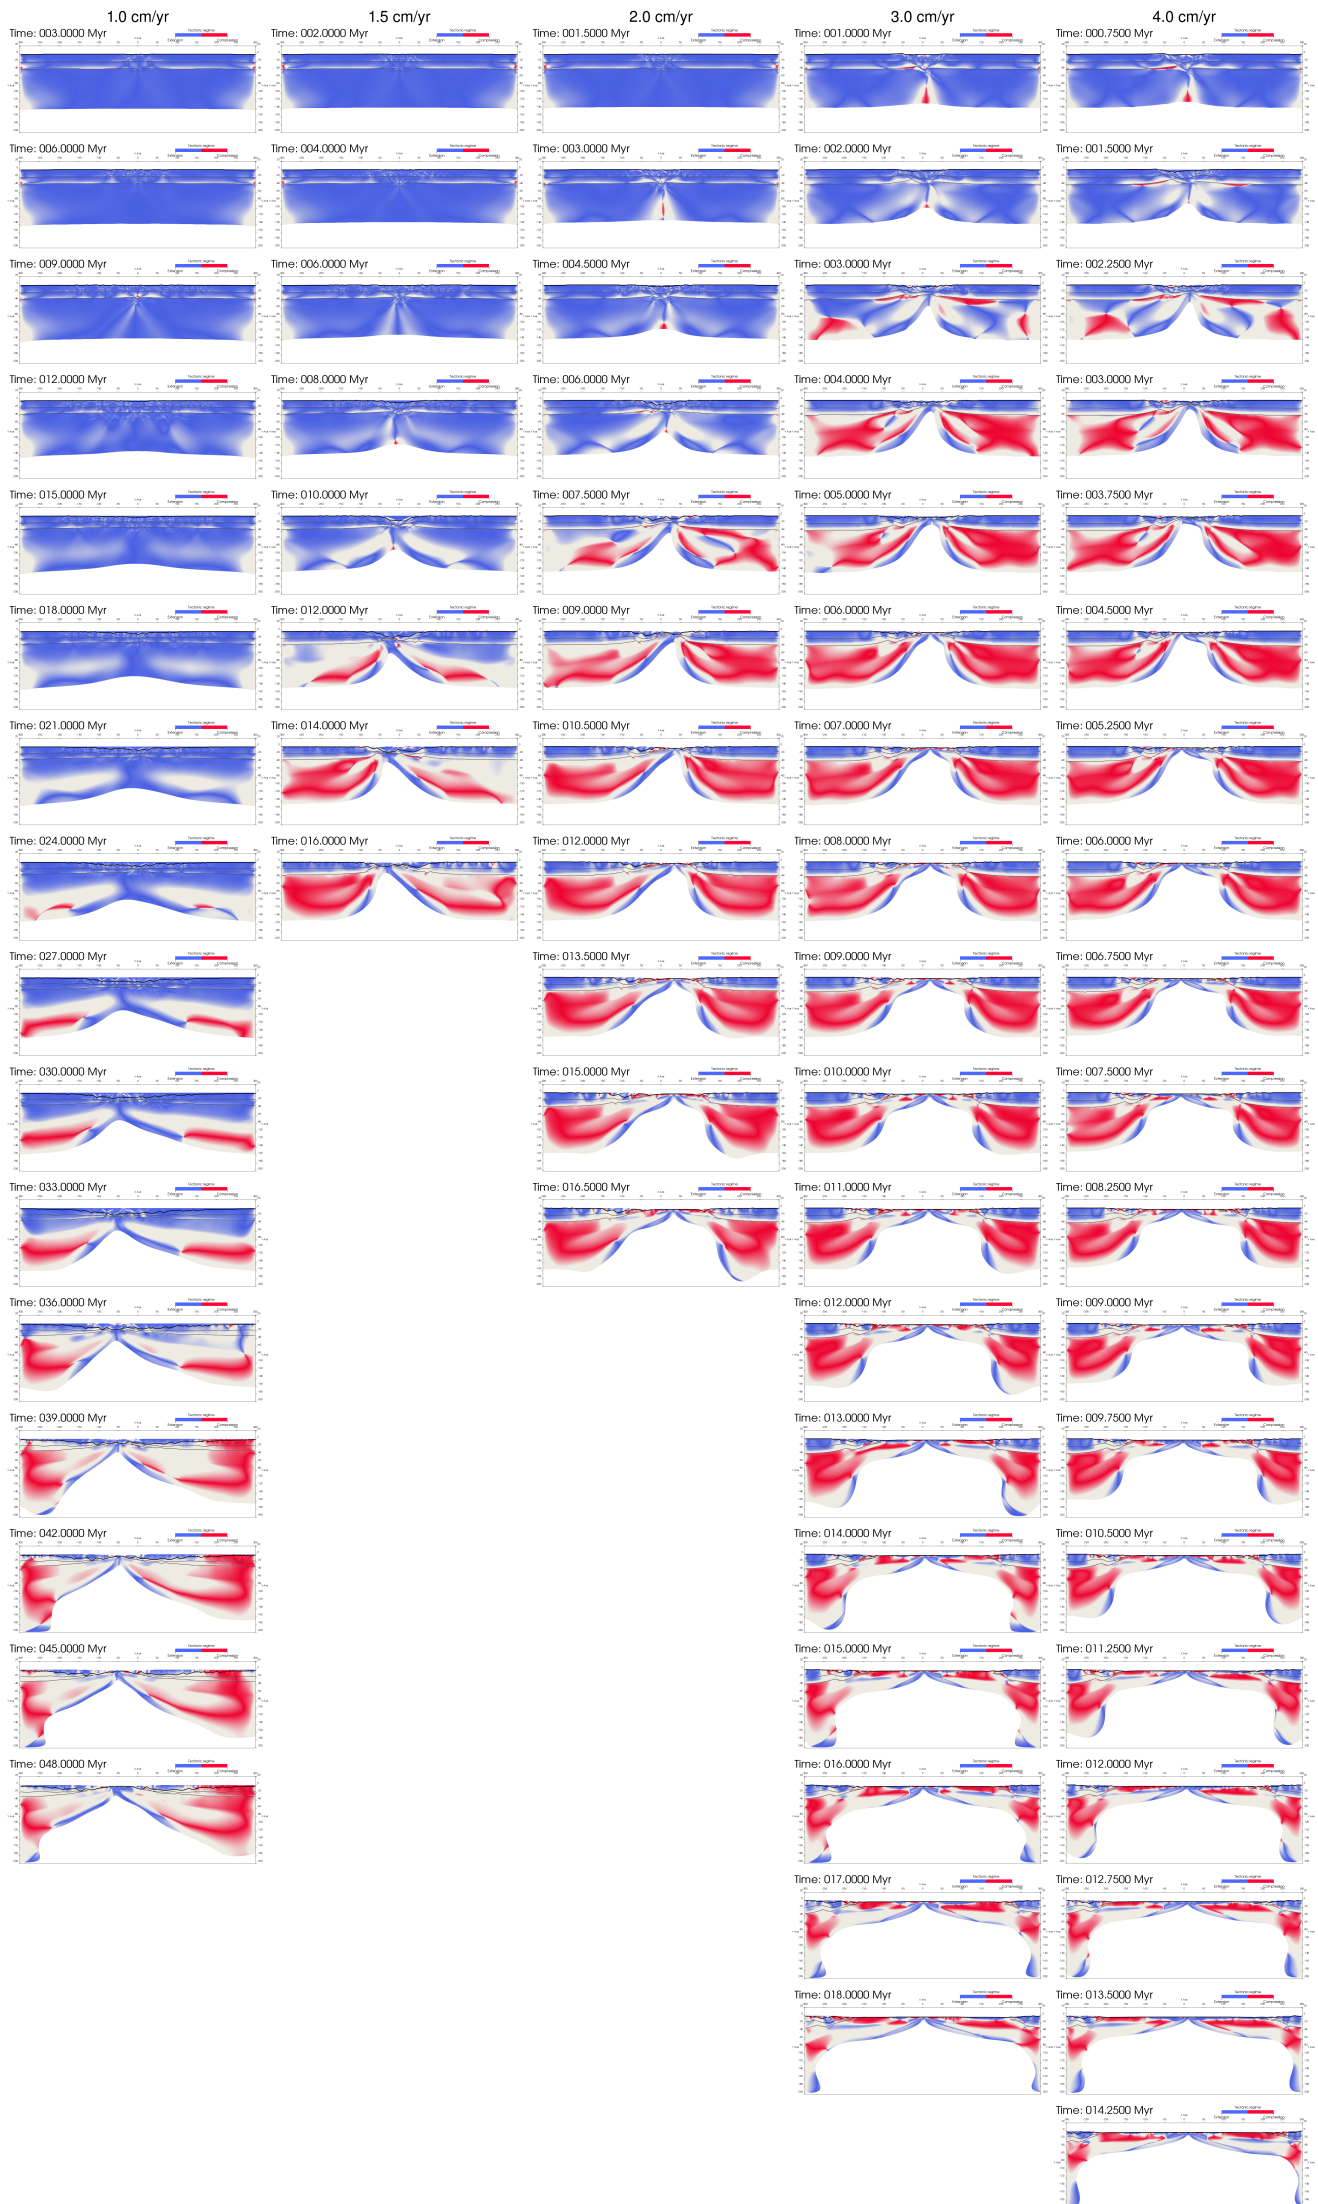



Margin gap to stop sedimentation: 60 km

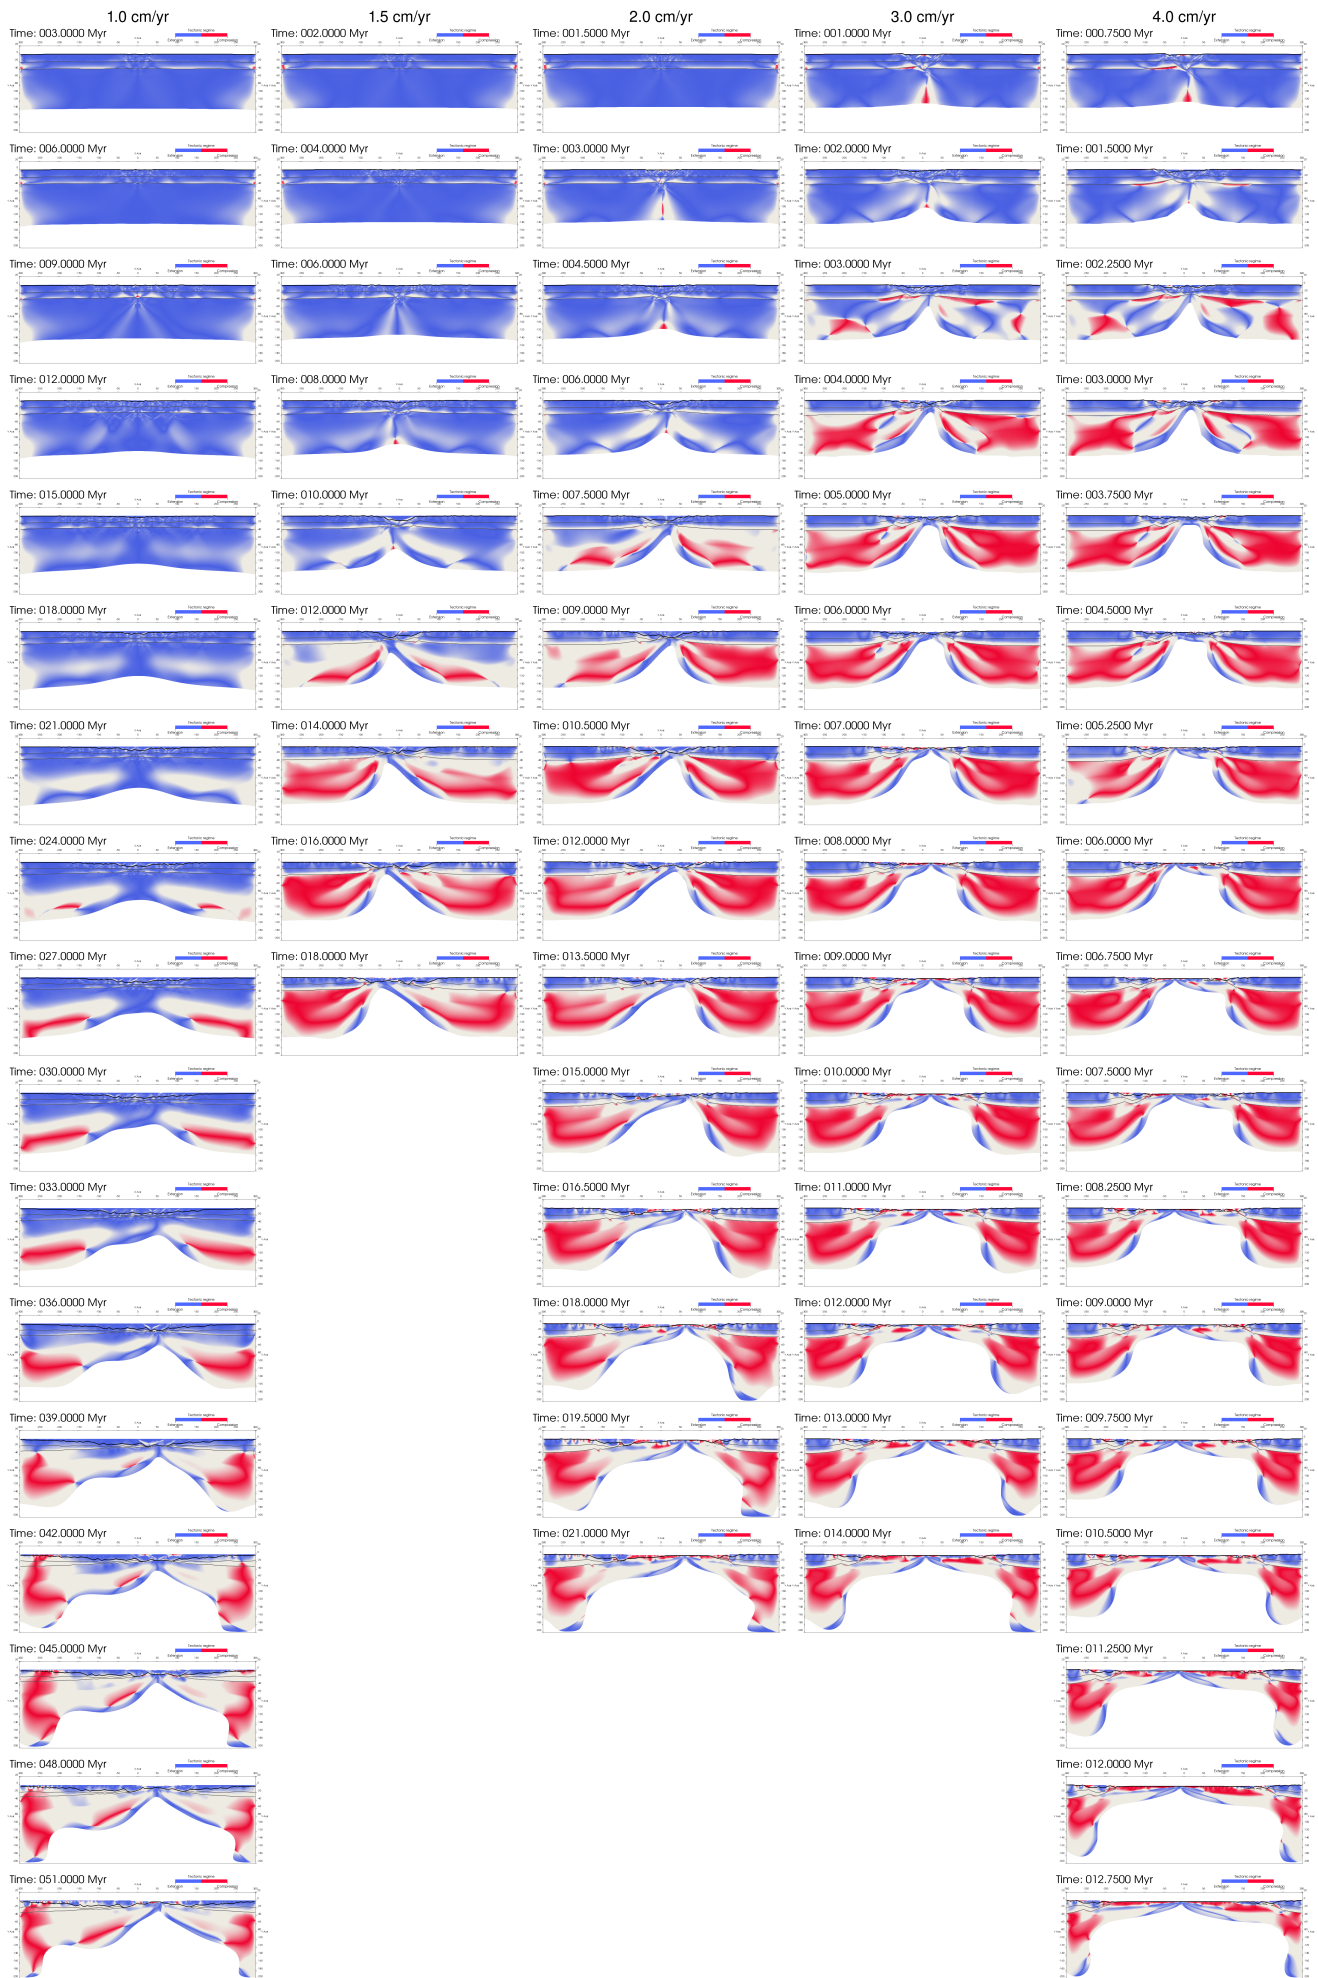

## 1.0 cm/yr

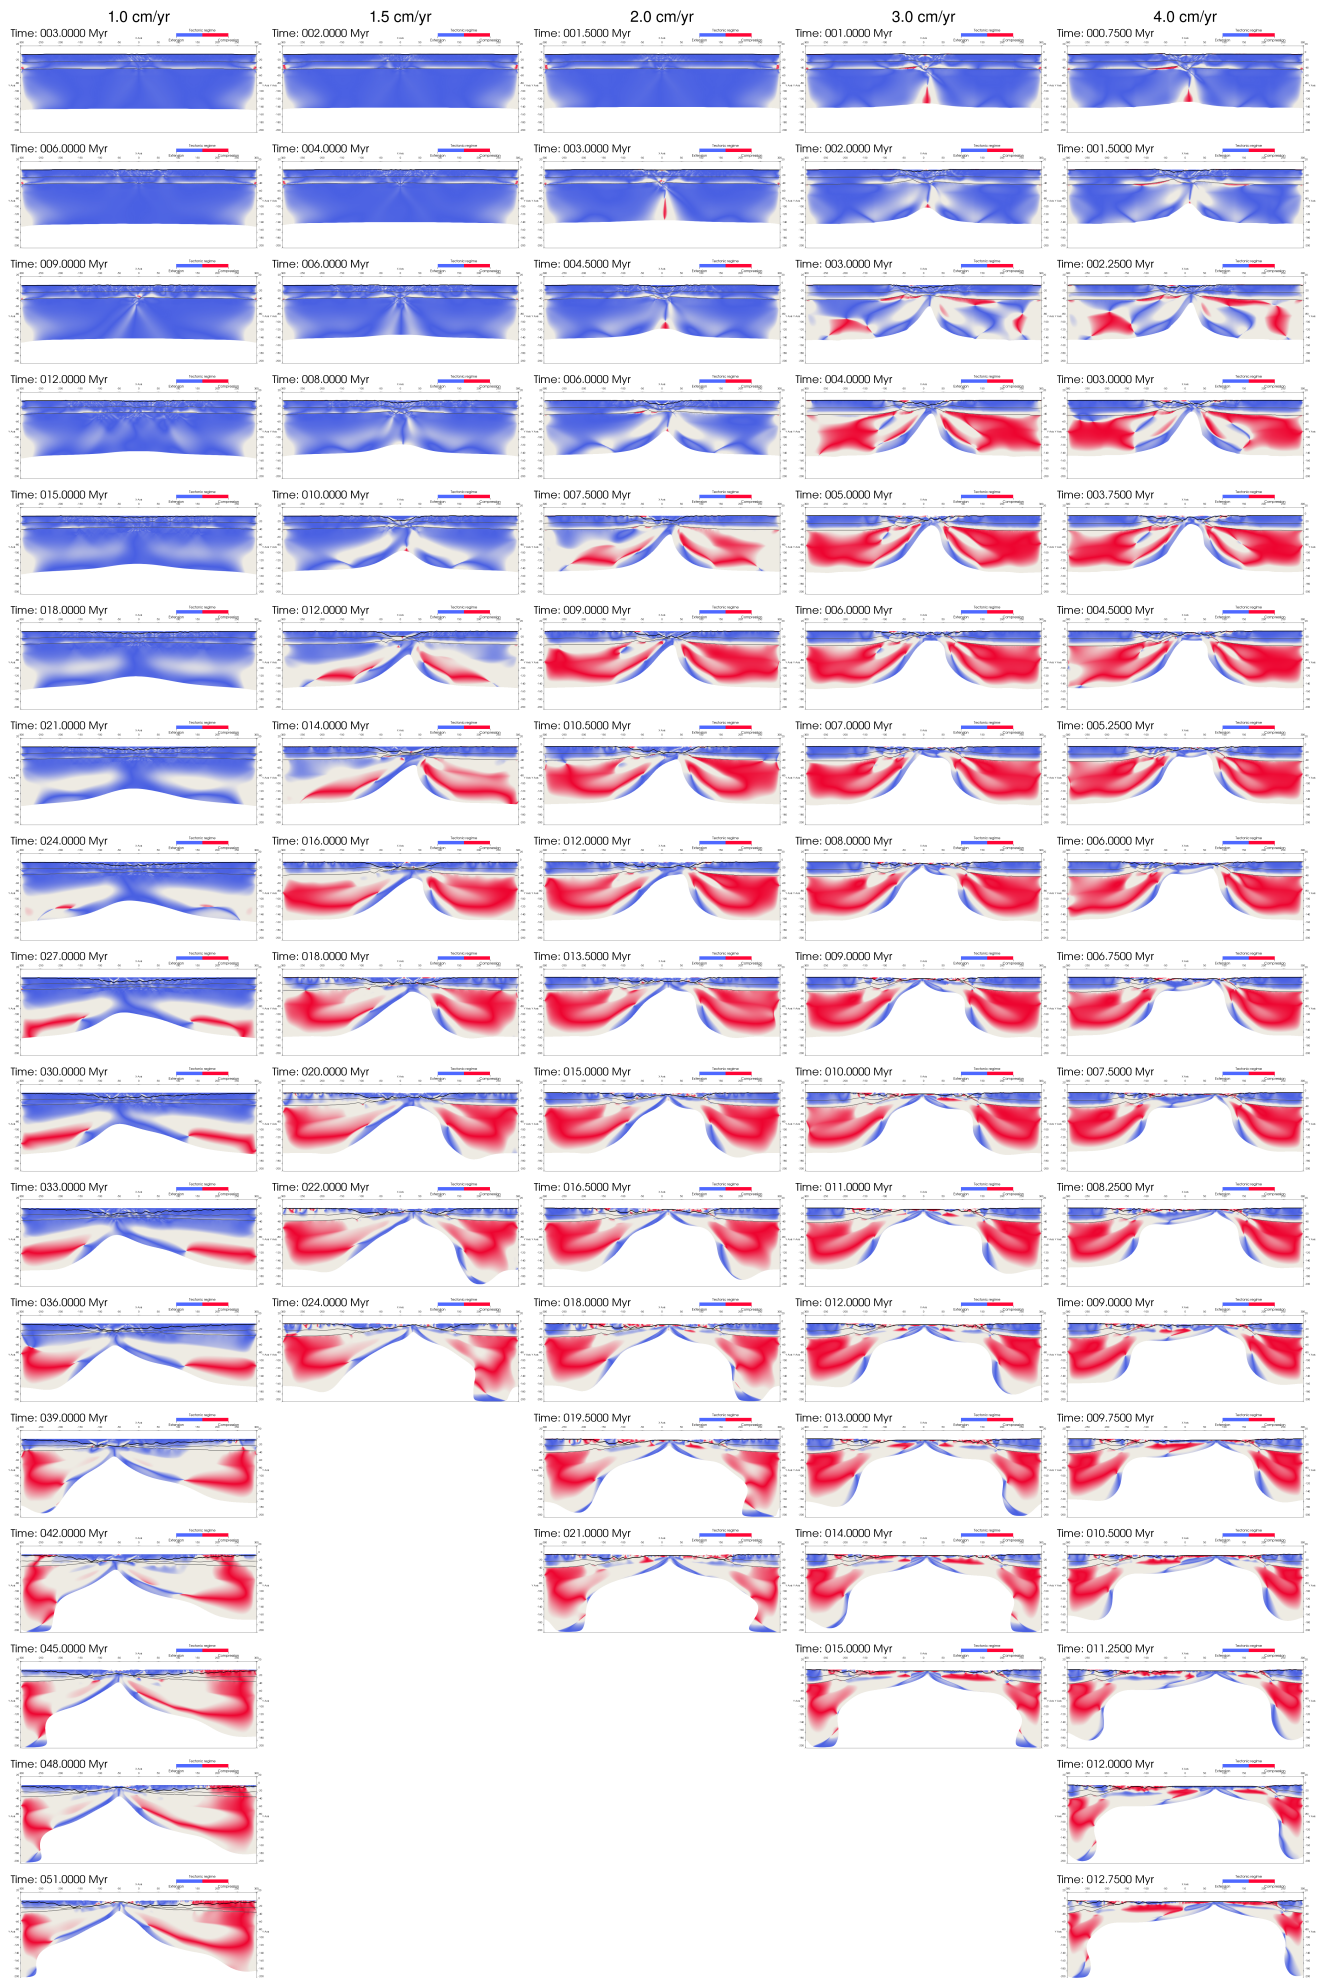



Margin gap to stop sedimentation: 100 km

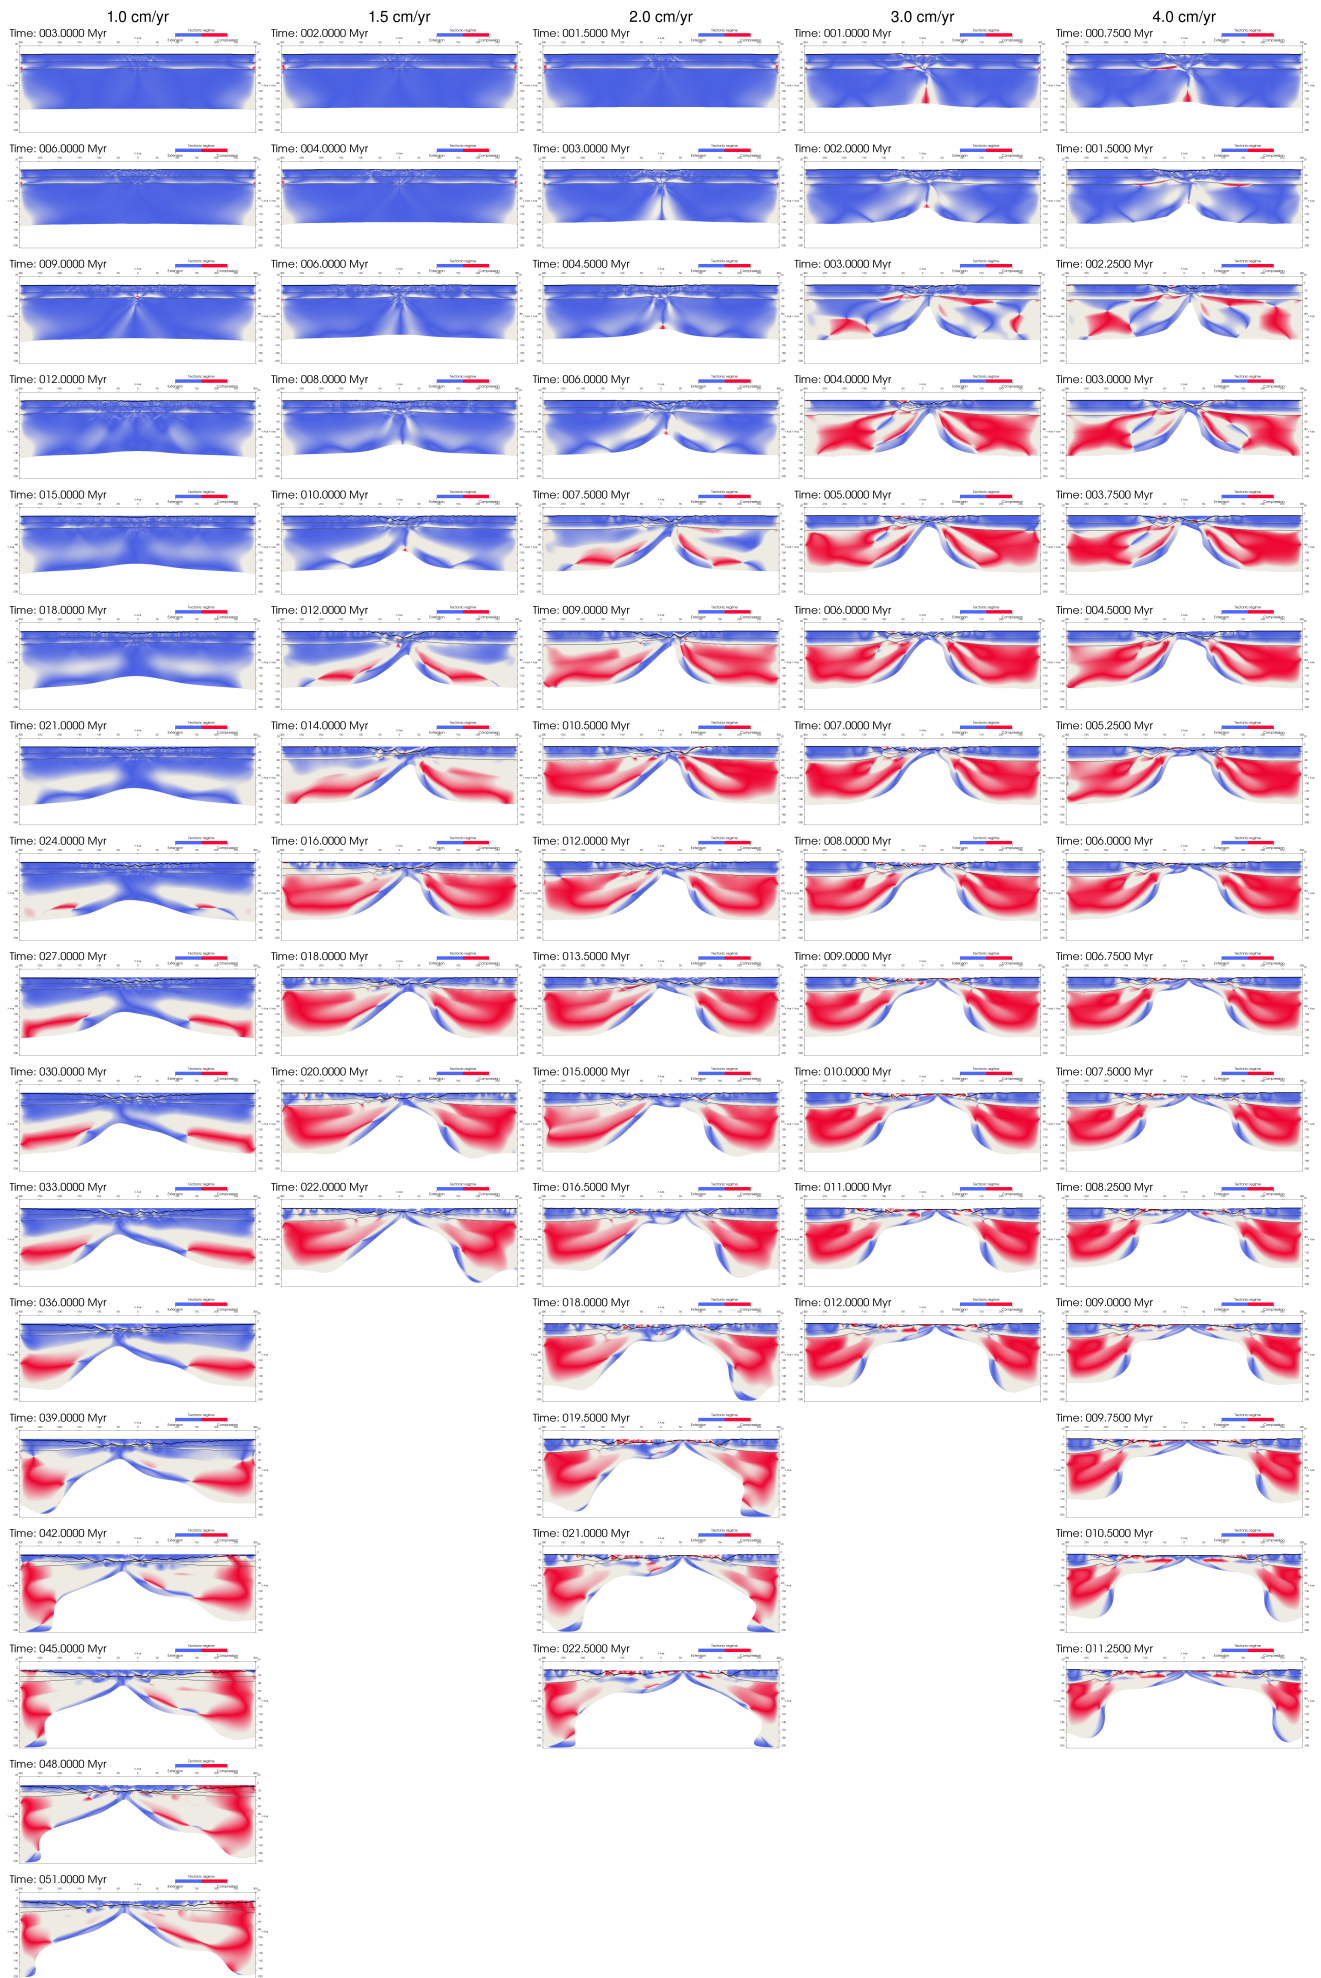

Supplement: Supplementary file 1 [file 1]
