# Supplementary material
Source: publisher figshare collection journal article supplement (https://gsapubs.figshare.com/articles/dataset/_/21644681)

Fig. S1

Margin gap to stop sedimentation: 2 km

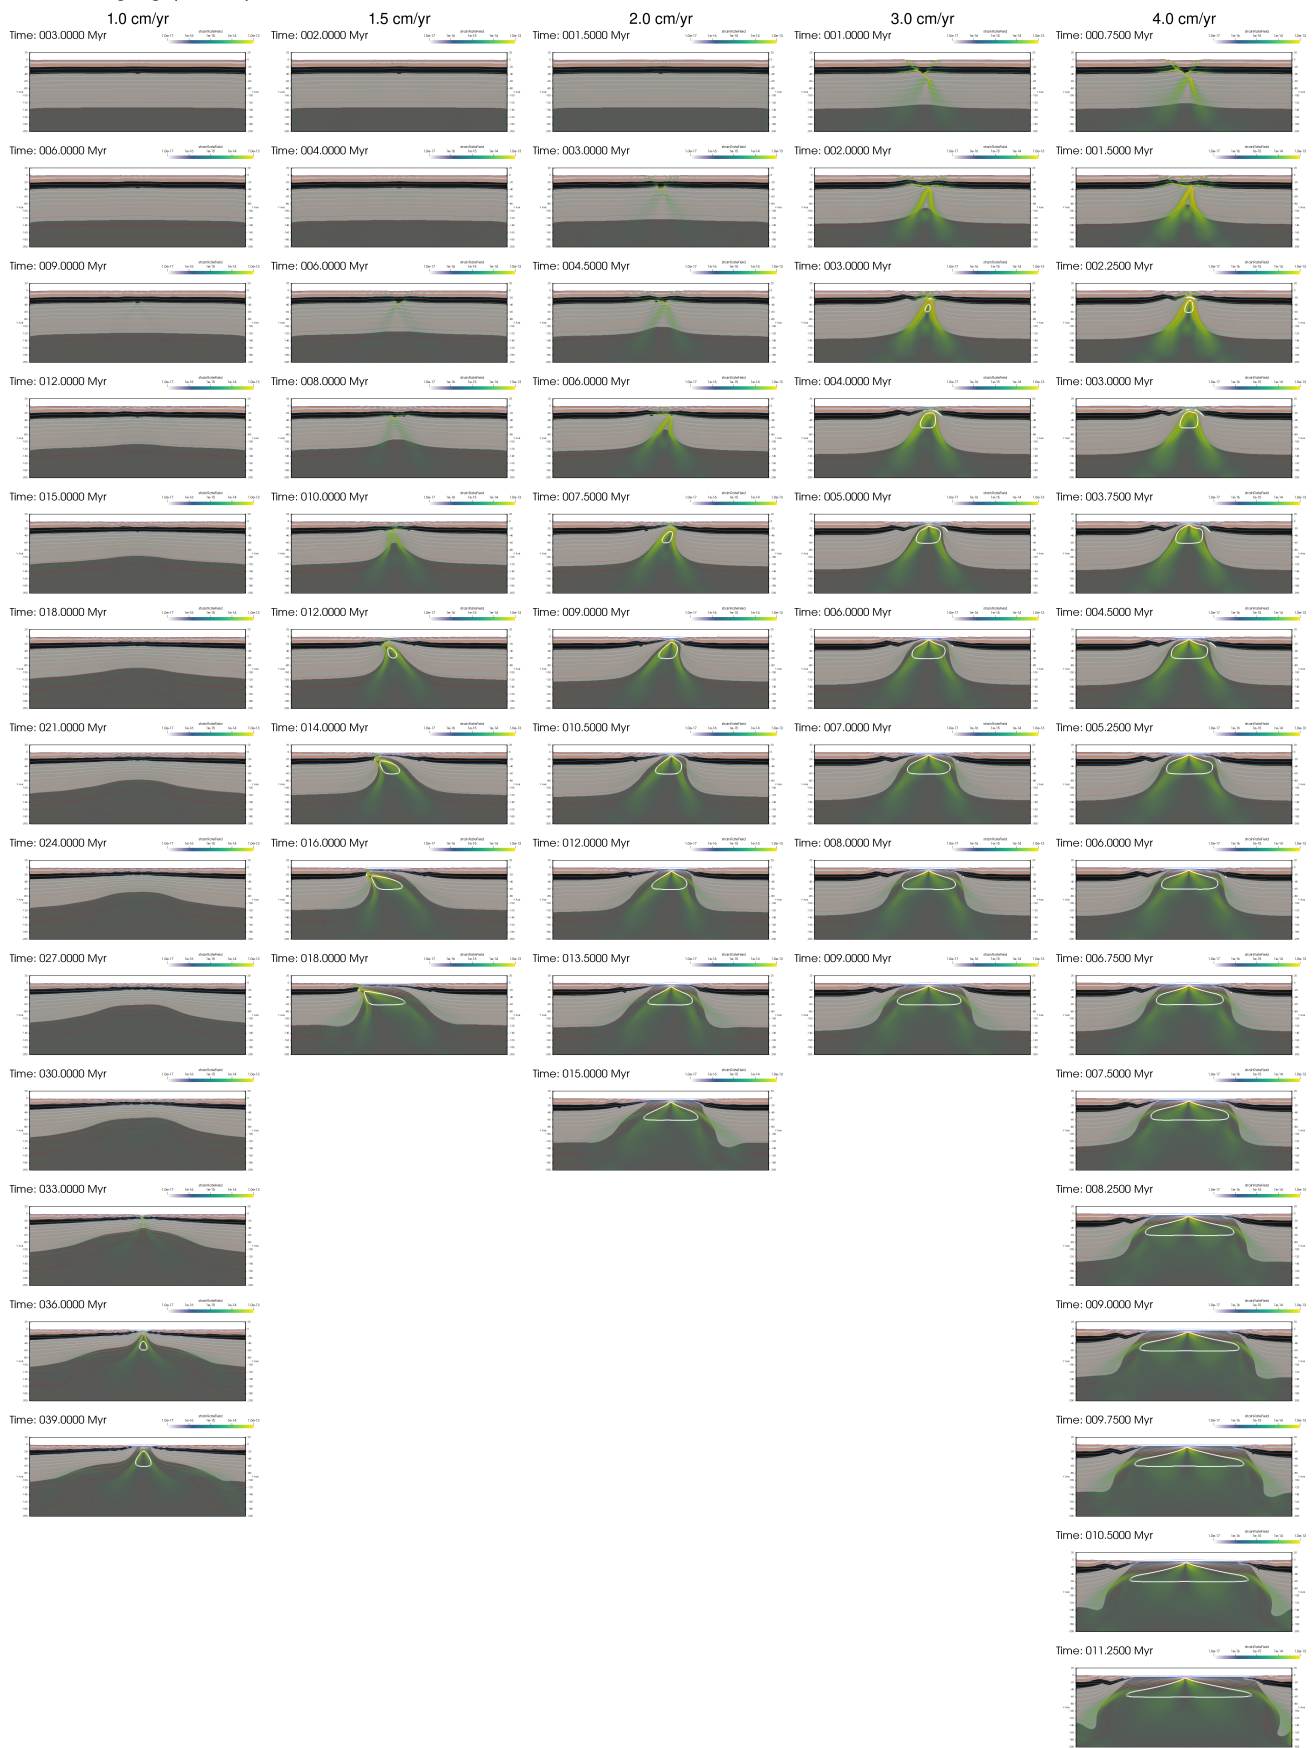

# Margin gap to stop sedimentation: 30 km

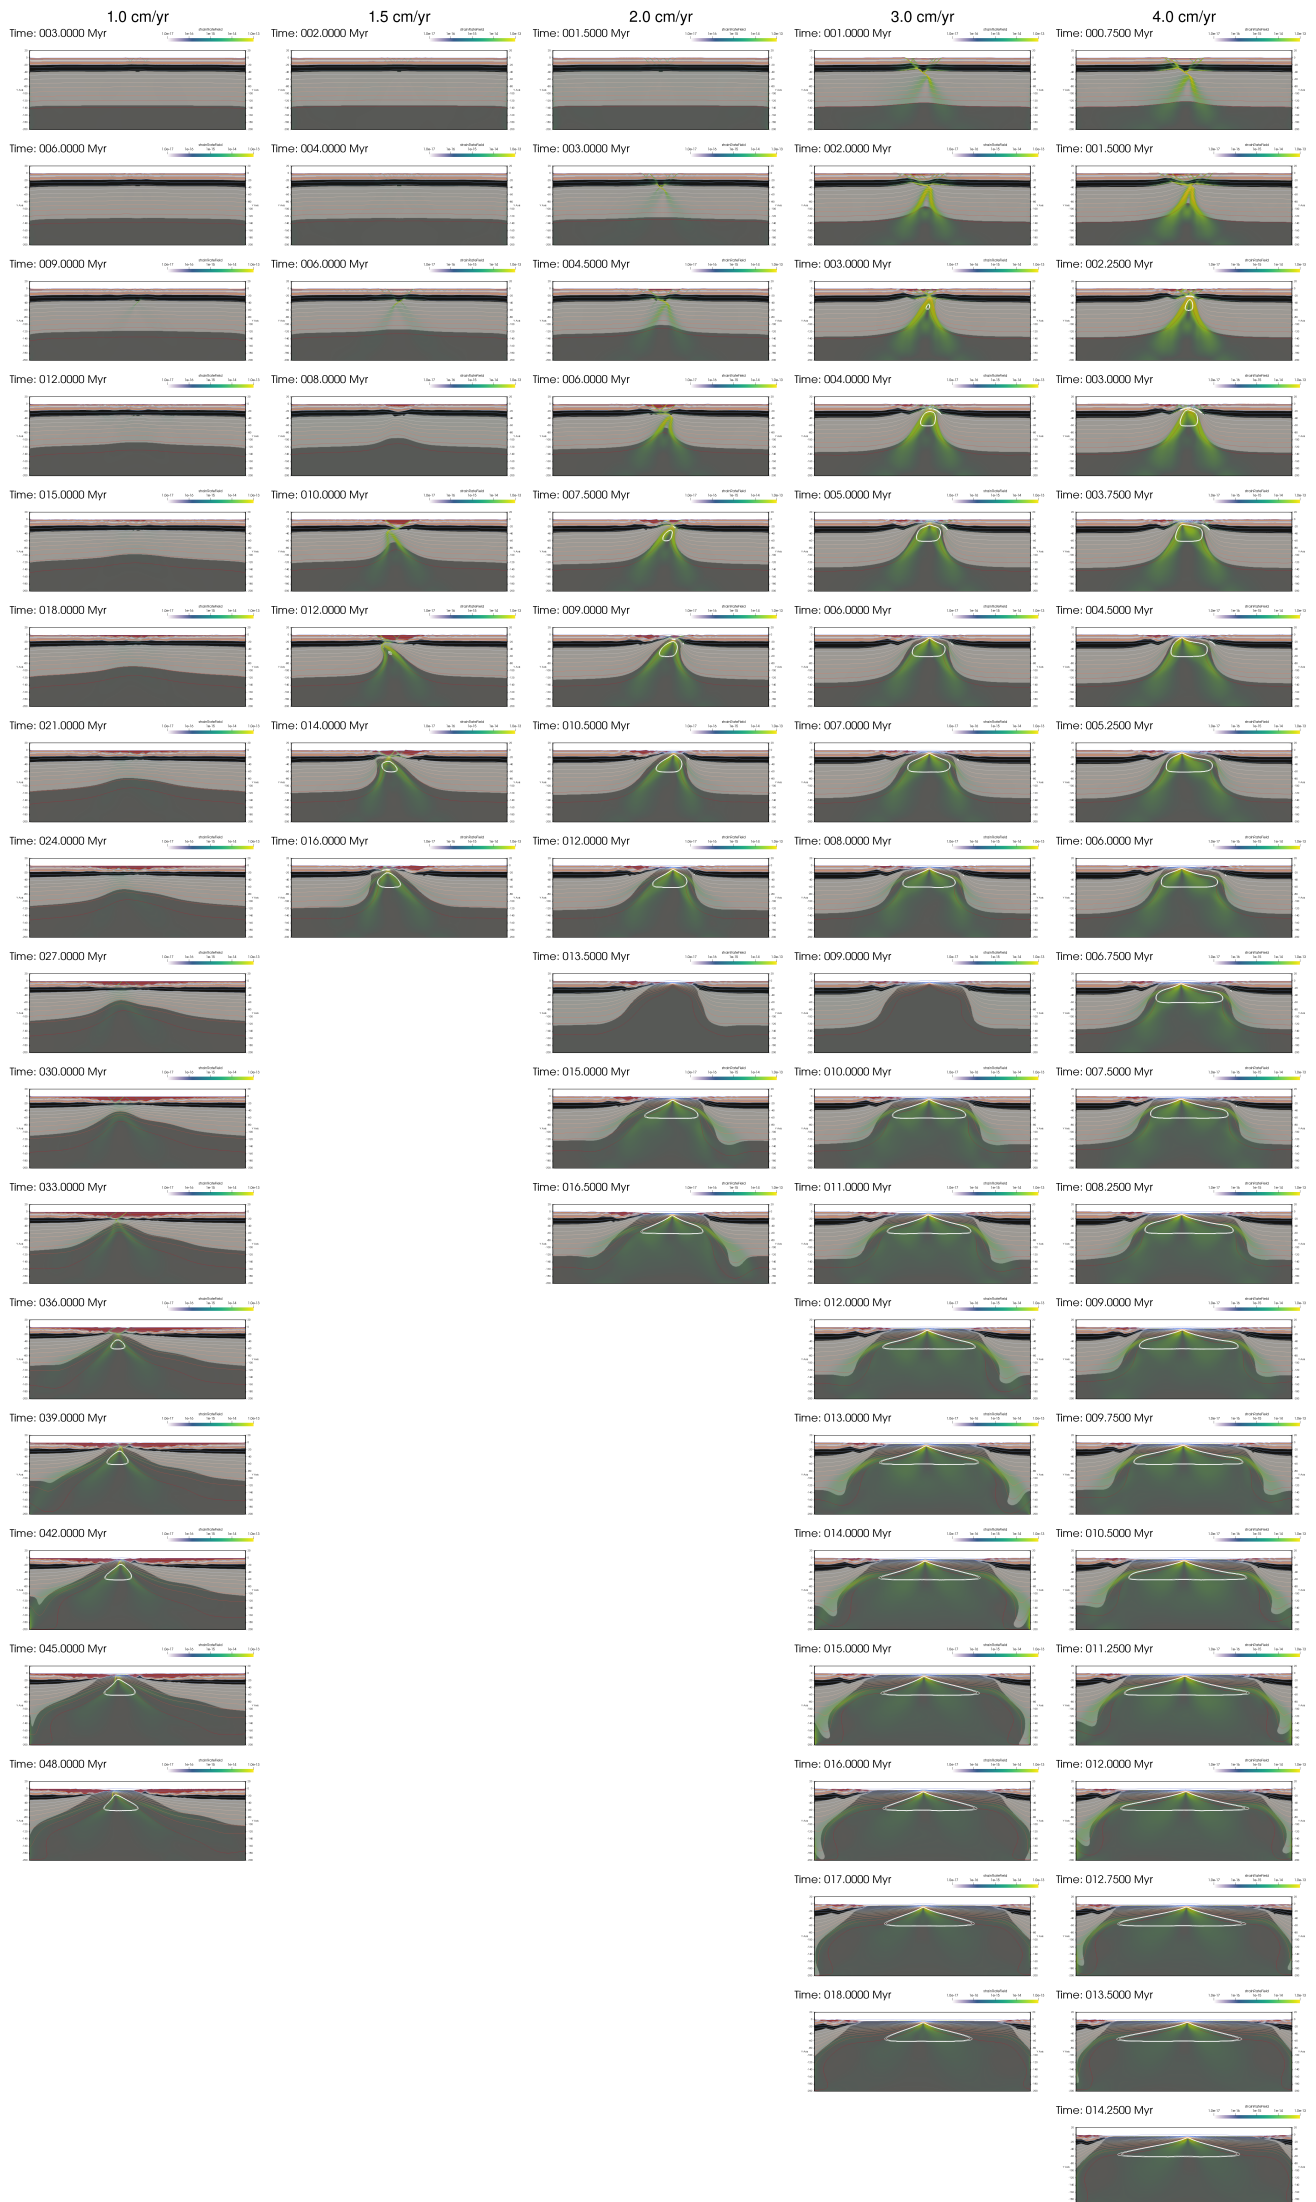



# Margin gap to stop sedimentation: 60 km

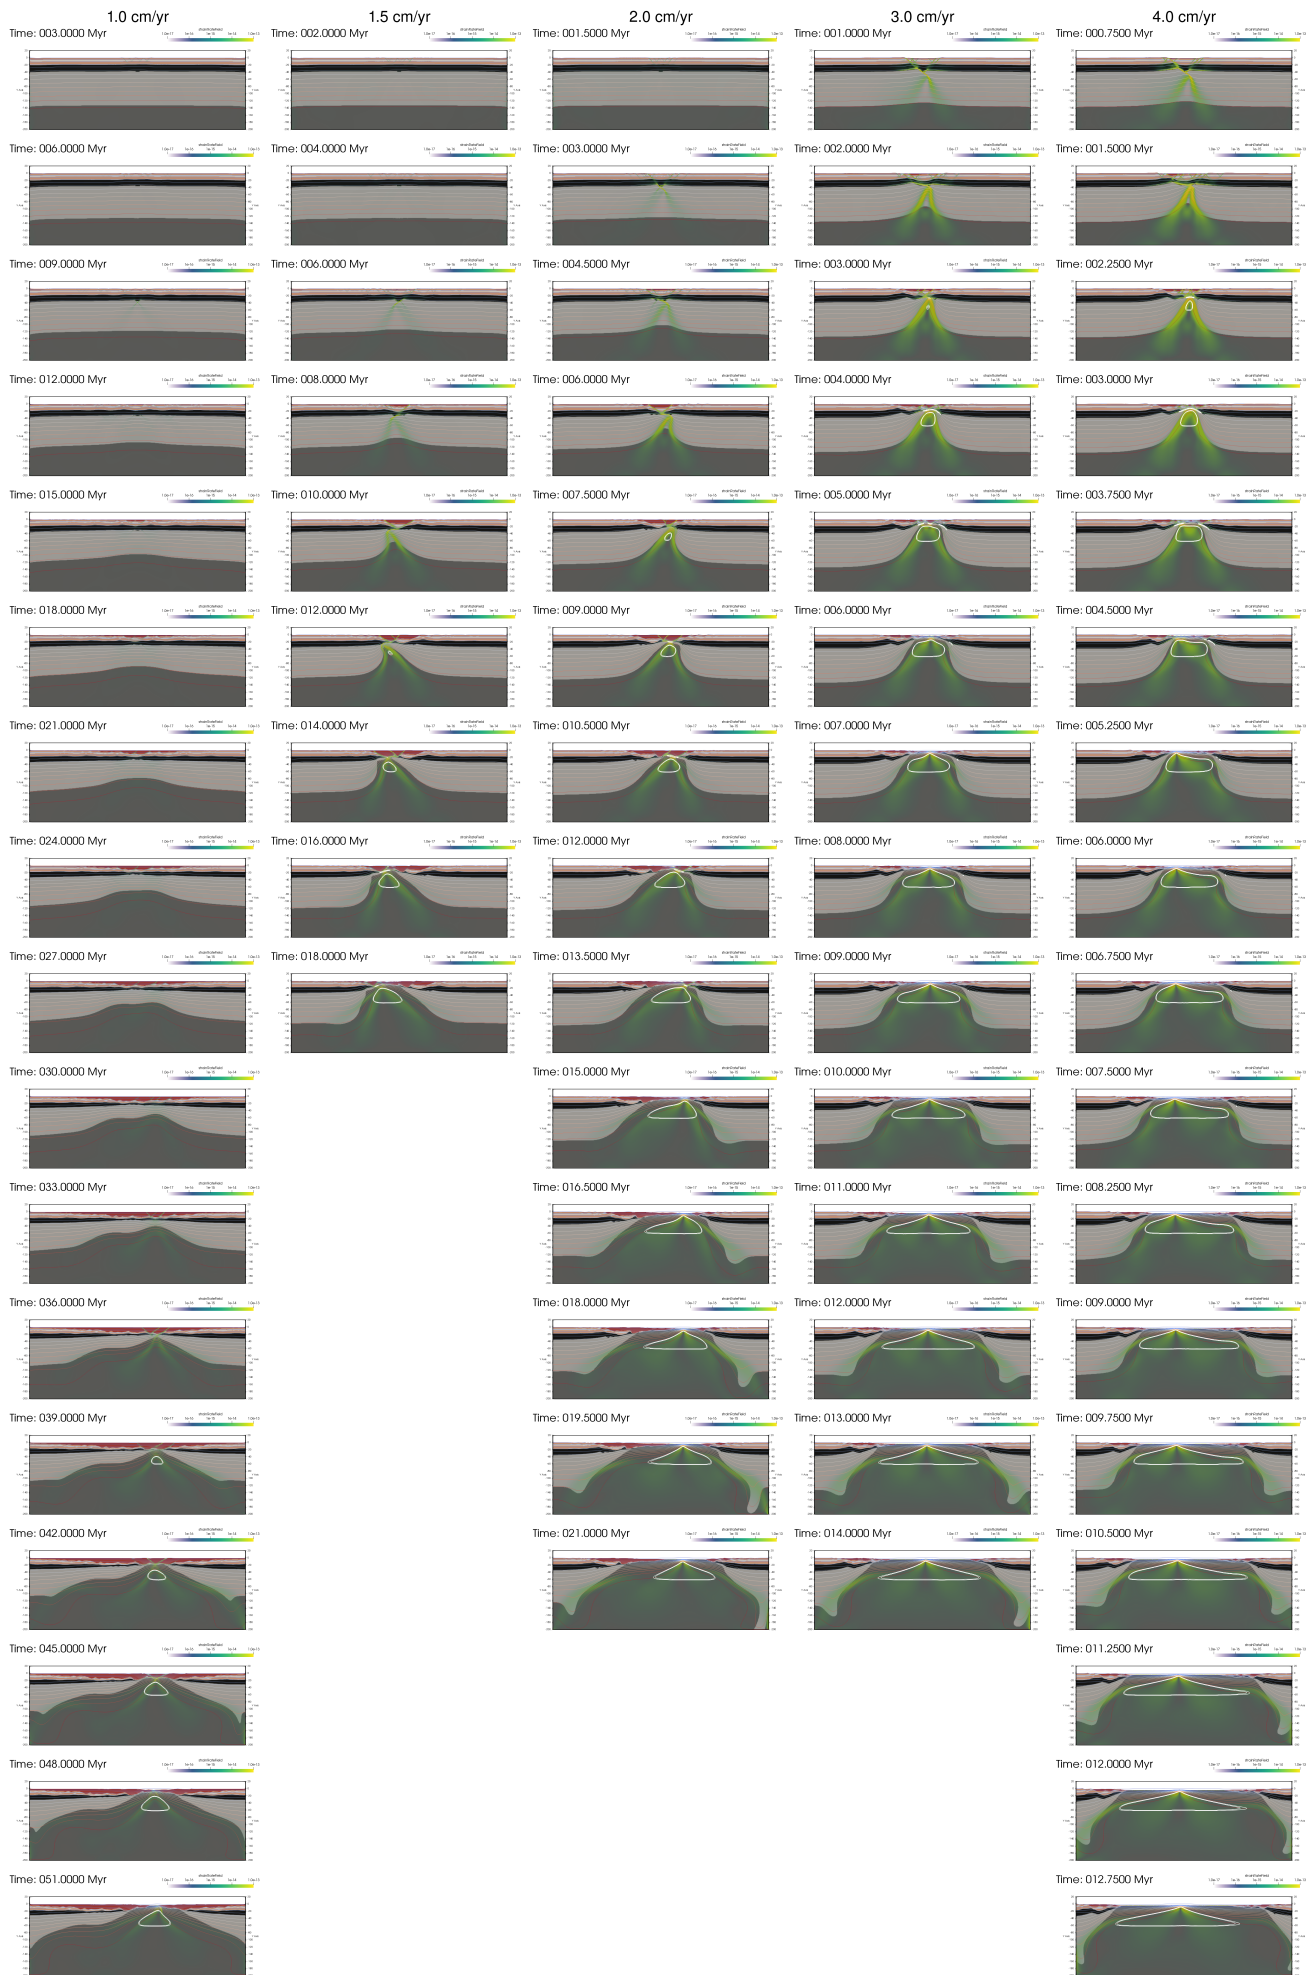

# Margin gap to stop sedimentation: 80 km

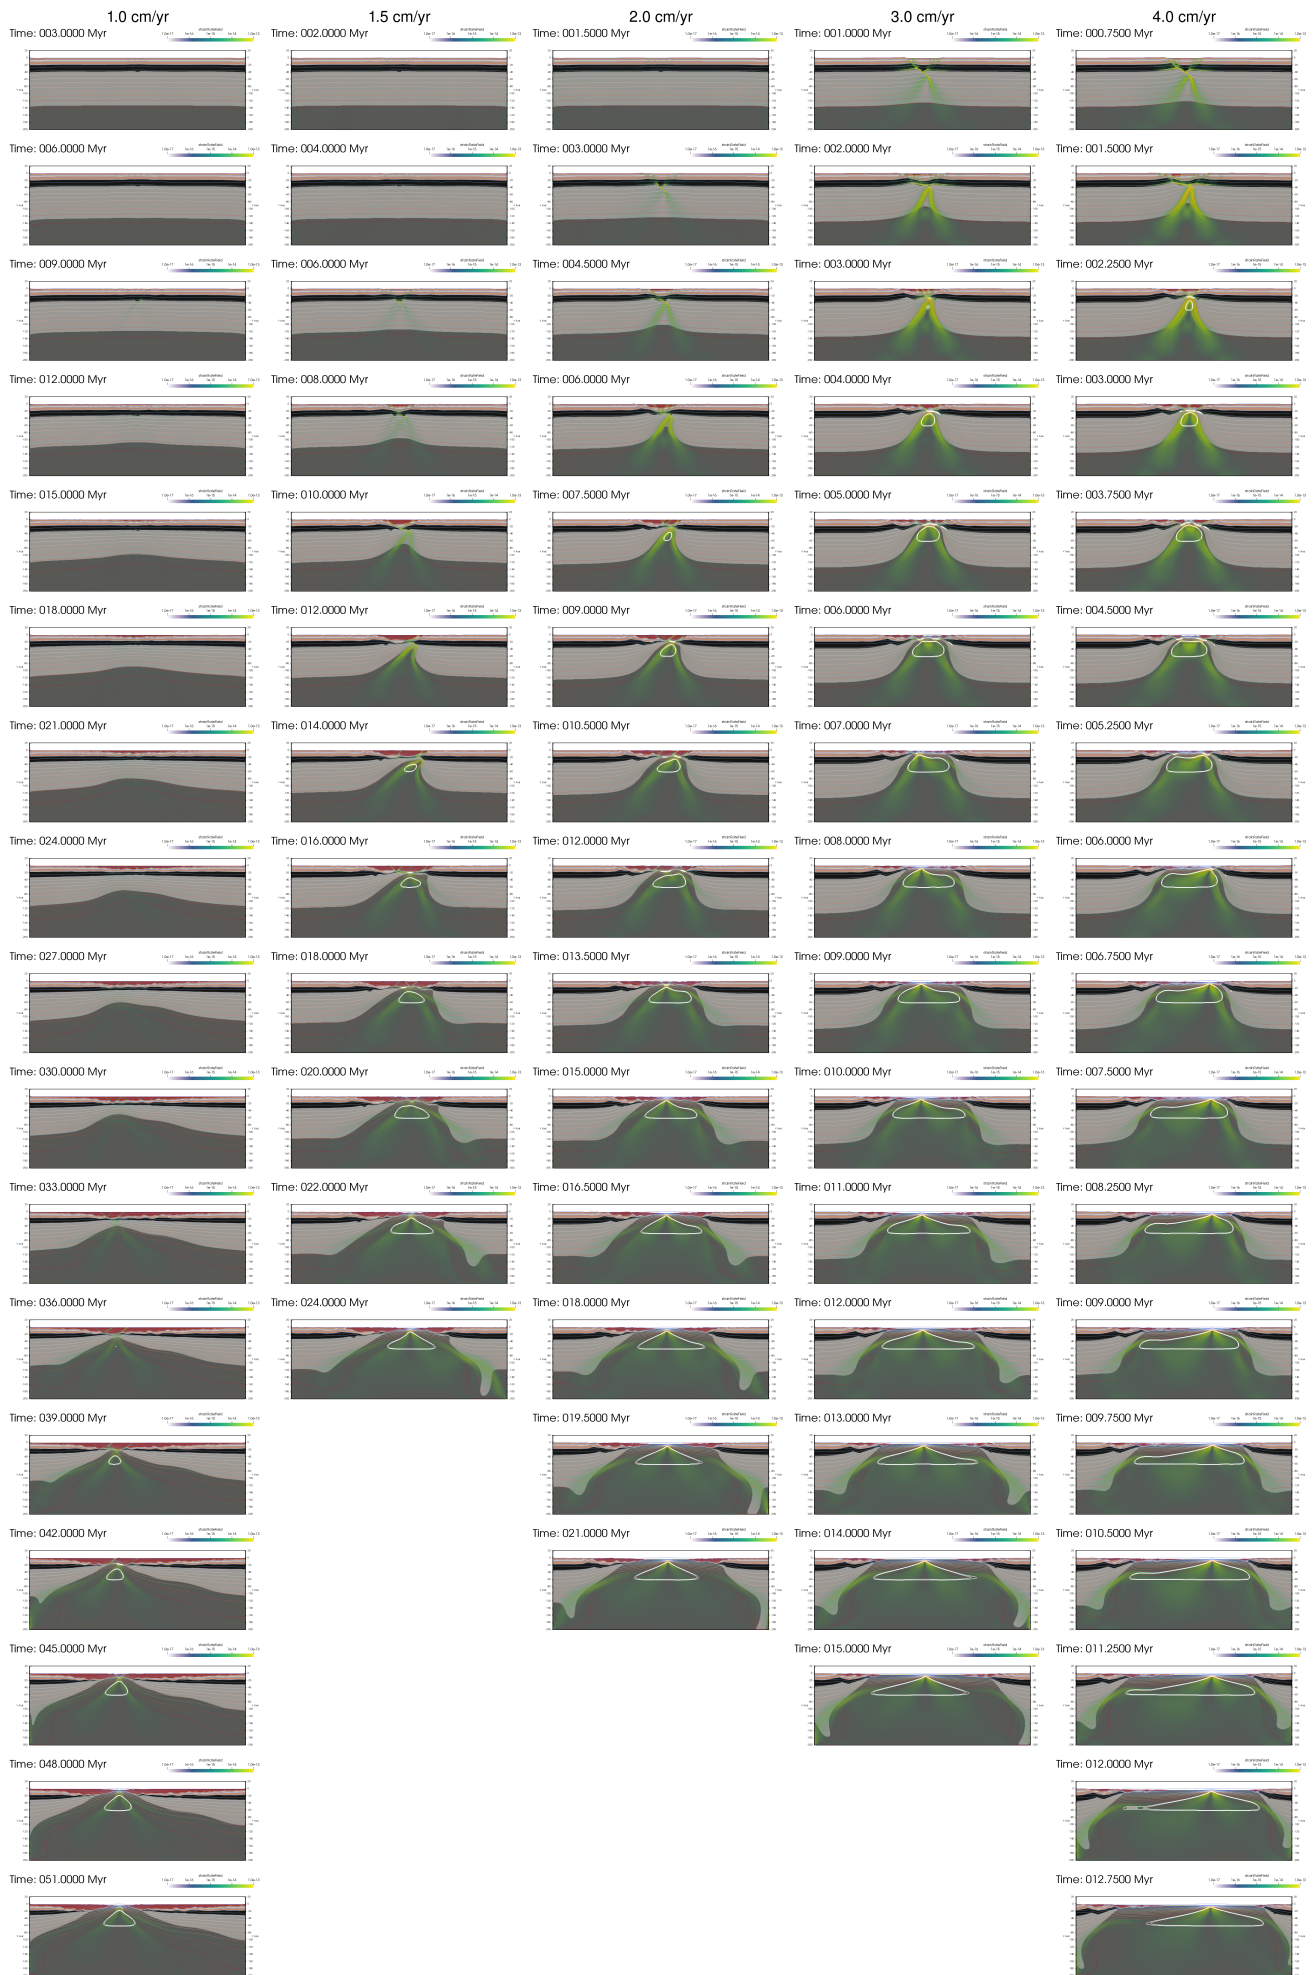

# Margin gap to stop sedimentation: 100 km

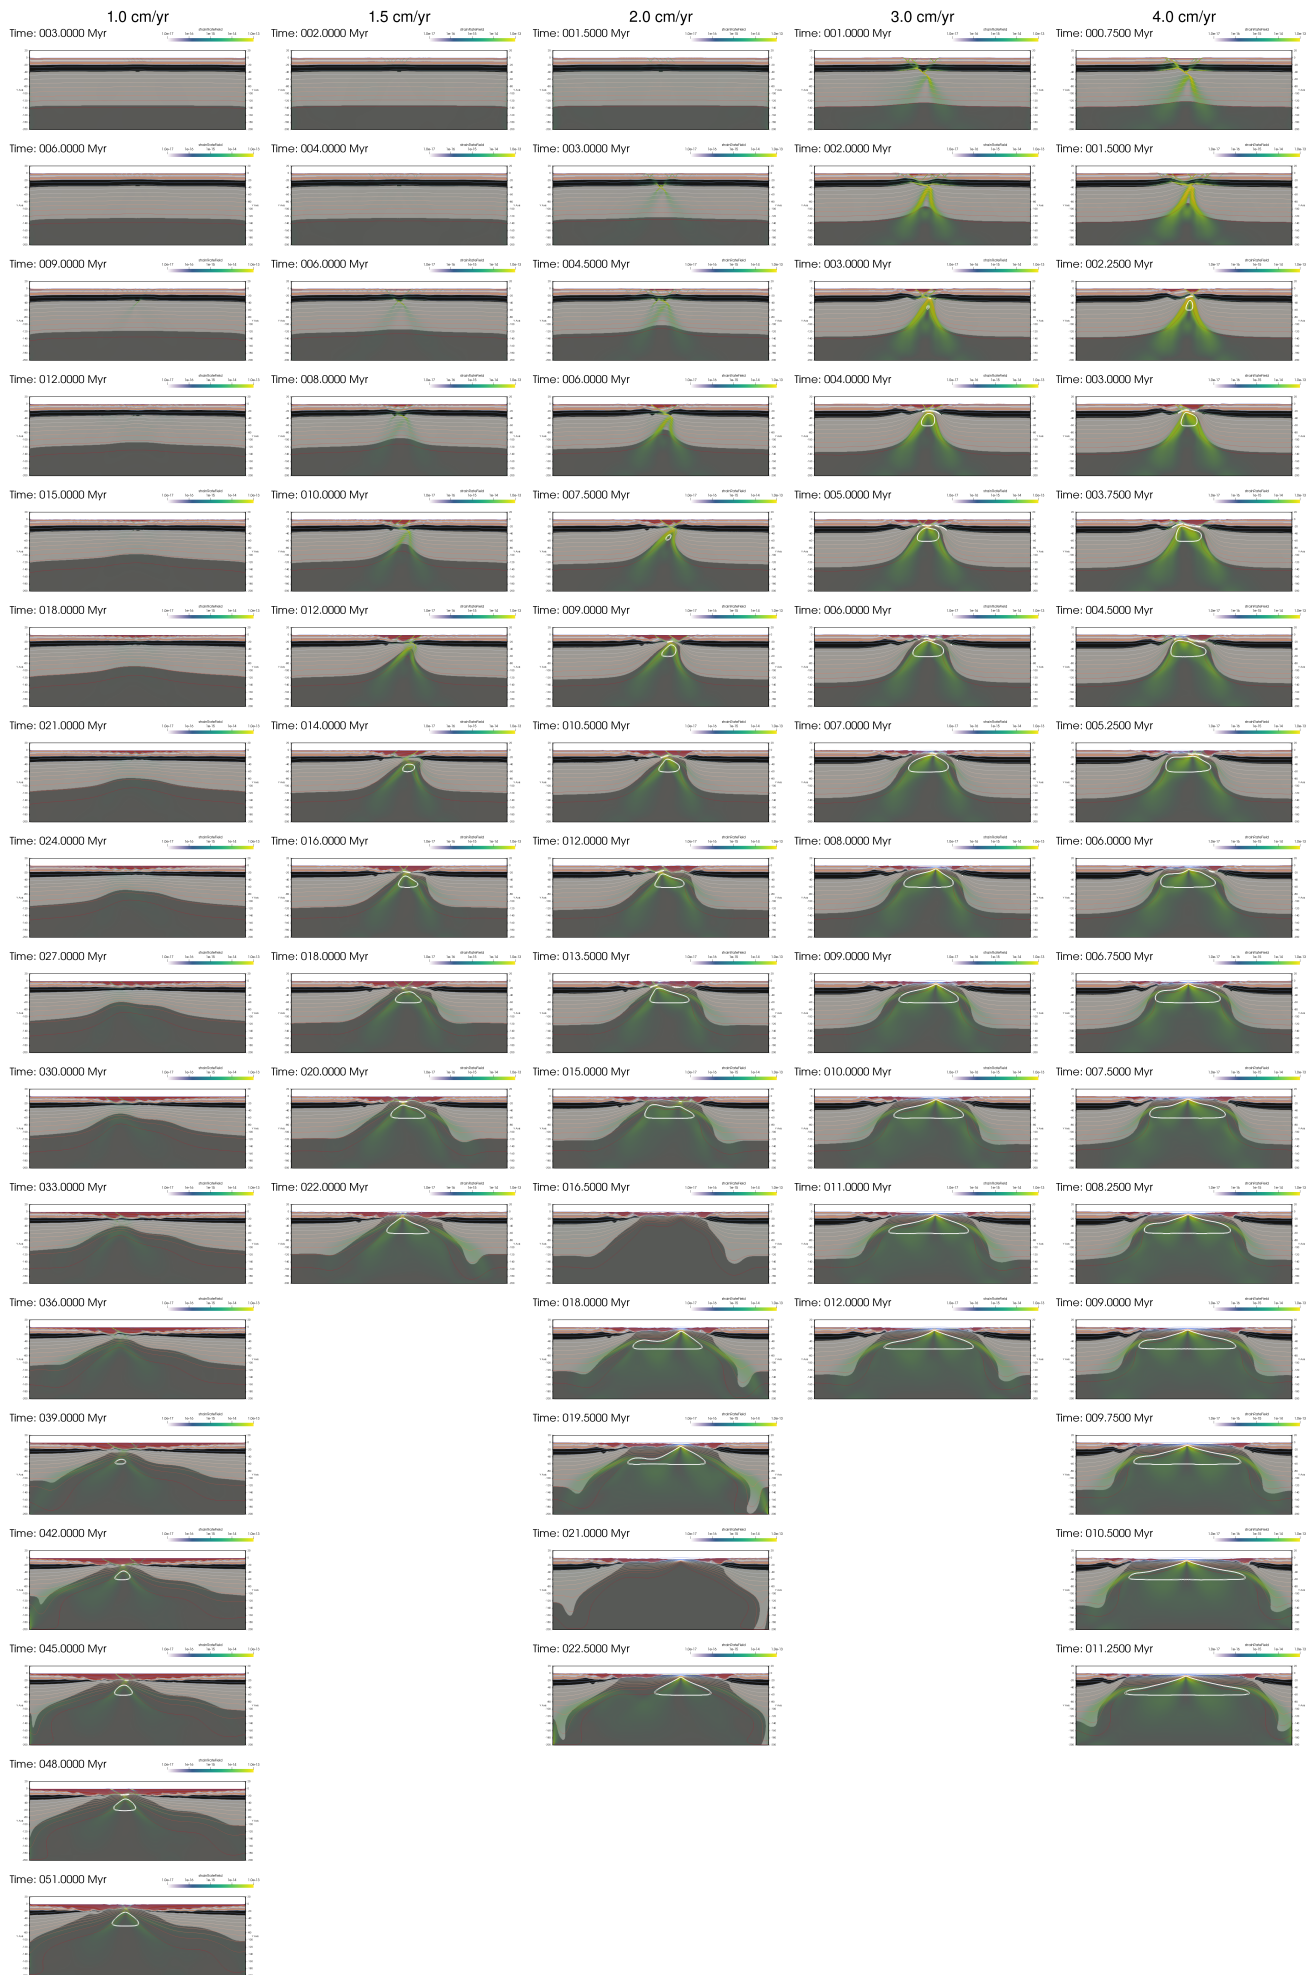

Supplement: Supplementary file 5 [file 1]
