# Supplementary material
Source: publisher figshare collection journal article supplement (https://gsapubs.figshare.com/articles/dataset/_/21644681)

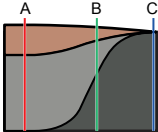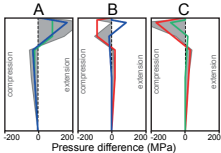

Supplement: Supplementary file 3 [file 1]

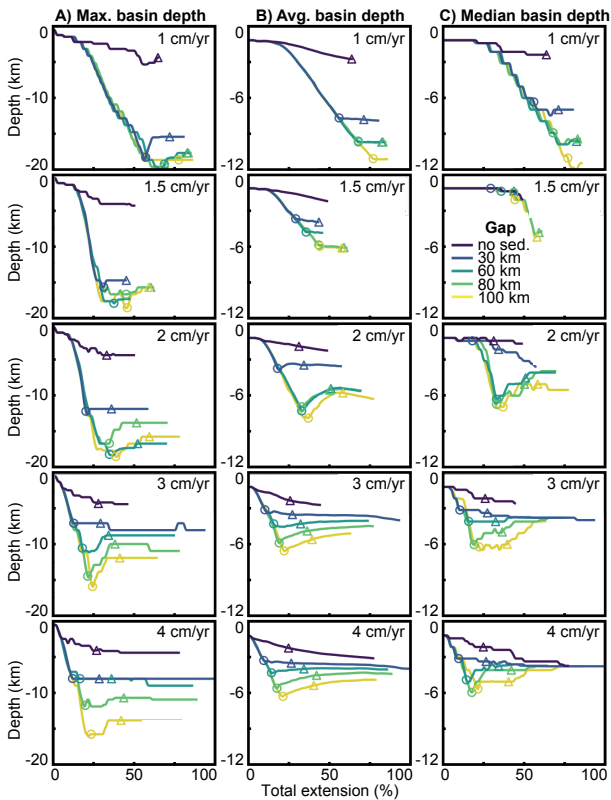

Supplement: Supplementary file 4 [file 1]
